# Supplementary material
Source: PubMed Central journal article supplement (PMC10620015)

## SOURCE DATA

**Figure 1c**

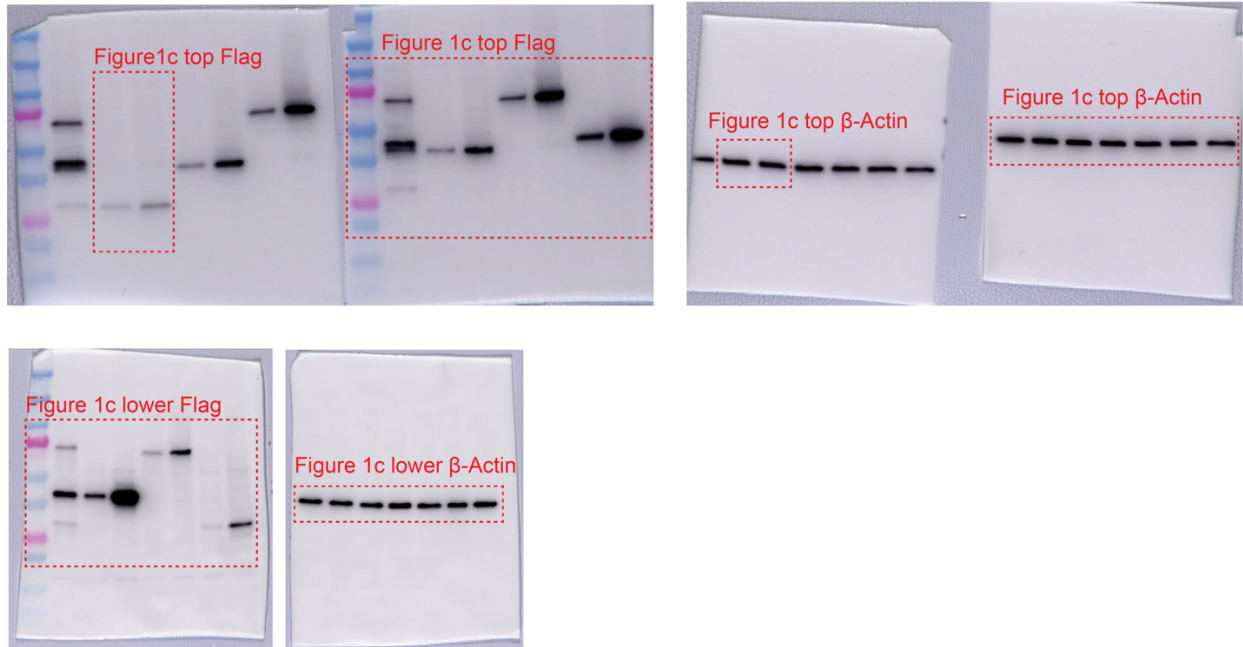

**Source Data Figure 1 | Uncropped Western blots images for Figure 1.**

Supplement: NIHMS1935489-supplement-Source_Data.pdf [file NIHMS1935489-supplement-Source_Data.pdf]
